# Supplementary material for: Improvement of cool-season food legumes for adaptation to intercropping systems: breeding faba bean for intercropping with durum wheat as a case study
Source: Front Plant Sci. 2024 May 16;15:1368509. doi: 10.3389/fpls.2024.1368509 (PMC11137300; doi:10.3389/fpls.2024.1368509)
Supplement: Supplementary file 1 [file Table_1.xlsx]

## Sheet: Supp
Entry	Name/Selection name	Pedigree
1	SelKFSH/013/237-1	F4 bulk/Giza blanca (ILB1270) X sel2004 latt 230.1 MH-223-1-237-1
2	SelKFSH/013/8-2	ILB1814 L1/96 X sel2004 latt 230.1--F6-W- 26
3	SelKFSH/013/47-4	F7/F5 (F7/8985/05 X sel 2004 lat 393-1)-THTRTR-70-4-47-4
4	SelKFSH/013/655-1	F6 / 1591 / 03/HBP/bot x Ascot/Fam 734-3-147-1-655-1
5	SelTH/011/59124-5	F7/8984/05 Xsel2004latt.214
6	SelTH/011/2454	HBP/S0C/2005 (Cold x Bot)
7	SelTH/011/2494-1	HBP/S0C/2005 (Cold x Bot)
8	Sel2009lat.307-4	BPL2527
9	THLT0271/012	HBP/S0C/2005 (Cold x Bot)
10	THLT0272/012	HBP/S0C/2005 (Cold x Bot)
11	THLT0278/012	HBP/S0C/2005 (Cold x Bot)
12	SelKFSH/014/298-1	F6 / 1597 / 03 - 2/HBP/bot x Ascot/Fam 735-2-42-1-547-2
13	SelKFSH/014/421-5	WBR 2-7 X sel 2004 latt 339-1--F6-W- 22
14	SelKFSH/014/869-1	F7/F5 (F7/8992/05 X sel 2004 lat 393-1)-THTRTR-74-198-6
15	Sel013/TERPYT-121-1	F5 (Fam 2-1-1 X sel 2004 latt 339-1)-THTRTR-41-1
16	Sel013/TERPYT-059-7	C08TerFam 272 XNA112
17	Sel013/TERPYT-083-1	VF6 X NA112
18	Sel013/TERPYT-083-2	VF6 X NA112
19	SelKFSH/014/110-1	F5- shutle Breeding/WRB1-4 X sel2004 latt 230.1 WF-378-2-592-3
20	SelKFSH/014/137-2	F5- shutle Breeding/WRB1-4 X F7/8983/05 WF-440-3-710-1
21	SelSIDS15/13126	F5 (F7/8975/05 X sel 2004 latt 214)-THTRTR-57-4
22	SelTerS13/167	S 88094-8-1
23	SelTerS13/596	Selection from Hudeiba
24	SelSIDS14/Giza1813	ILB4357 X Giza 402
25	SelSIDS14/Giza429	Giza 429-2
26	SelTerS13/5037-5	Giza843X Sel. F7/8975/05
27	SelTer17/10554	India-1xSel. 2008 Latt. 778-4
28	SelTer17/10582	F7/7789-2/05-HBP/S0D/2000
29	SelTer17/10558	India-1xSel. 2008 Latt. 179
30	SelTer17/10717	BPL5061
31	SelTH10463-1/2010	HBP/DSO/2000
32	SelTH10240-1/2010	10706-5/2010/S 98013 ( DC )
33	SelTer17/10714	Selection From Hudeiba
34	ICAWHITE	HBP/S0C/2003
35	Rebaya 40	ILB360
36	ICARUS	BPL710
37	Sel TER2015/5899	Sel.2010-Cold/478-7xSel.2010-20560-4
38	Sel TER2015/5732	F7/7020/05-HBP/S0D/2000
39	Giza 4	ILB1820
40	Misr 1	Giza 3 x 123A/45/76
